# Supplementary material
Source: ML conference proceedings conference paper supplement (https://openreview.net/forum?id=qVc7NWYTRZ6)
Supplement: supplementary_material [file attachment]

| Hyperparameter                  | Value                          |
|---------------------------------|--------------------------------|
| <i>MAE Pretraining</i>          |                                |
| optimizer                       | AdamW [38]                     |
| base learning rate              | 1e-4                           |
| weight decay                    | 0.05                           |
| optimizer momentum              | $\beta_1, \beta_2 = 0.9, 0.95$ |
| batch size                      | 4096                           |
| learning rate schedule          | cosine decay                   |
| total batches or iterations     | 249600                         |
| warmup iterations               | $1/8 \times$ total iterations  |
| augmentation                    | RandomResizedCrop              |
| #GPU                            | 64 V100 (32 gb)                |
| Wall-clock time                 | $\sim 36$ hours                |
| <i>Encoder ViT Architecture</i> |                                |
| #layers                         | 12                             |
| #MHSA heads                     | 12                             |
| hidden dim                      | 768                            |
| class token                     | yes                            |
| positional encoding             | sin cos                        |
| <i>Decoder ViT Architecture</i> |                                |
| #layers                         | 8                              |
| #MHSA heads                     | 16                             |
| hidden dim                      | 512                            |
| class token used                | yes                            |
| positional encoding             | sin cos                        |

Table 3: Training and architectural hyperparameters for MAE pretraining.

## A MAE Hyperparameters

We list key hyperparameters for the MAE training loop in Table 3. Note that these parameters were employed directly from original MAE paper [8] and are actually shared by relevant robotics baselines [13, 18]. Consistent with the terminology in [8], the employed learning rate is the base learning rate scaled by (total batch size / 256). For a head-on comparison with prior work [8, 13], we train the ViT for iterations equivalent of 800 epochs over ImageNet dataset. This rigorous benchmarking took # GPUs  $\times$  wall clock time  $\times$  # data ablations =  $64 \times 1.5 \times 12 = 1152$  GPU days.

## B BC Hyperparameters

The following section describes the hyperparameters used in our behavior cloning loop. As discussed in Sec. 3, the BC policy begins by taking in the image and passing it through the pre-trained encoder to get a representation,  $E(i_t)$ . That representation is then concatenated to the joint information to get a policy input,  $x_t = [E(i_t), j_t]$ . The policy input is fed through a 2-layer mlp network, with a batchnorm preceding the first layer, ReLU activations [3], and hidden dimensions of [512, 512]. Additionally, we add dropout [19] to the two mlp layers w/ probability  $p = 0.2$  after the ReLU activations. The result of the top layer is then passed to 2 linear layers, that predict the mean ( $\mu$ ), mixing parameters ( $\phi$ ), and standard deviation ( $\sigma$ ) of a Gaussian Mixture Model (GMM) distribution w/  $m$  modes:

$$p(x) = \sum_{i=1}^m \phi_i N(x | \mu_i, \sigma_i)$$

The choice of GMM was based on prior work [36, 37] that showed it could dramatically improve performance. After some tuning, we used  $m = 5$  on the RoboSuite tasks (note their benchmark [36] used  $m = 5$ ) and the real world tasks, since it worked best. However, for Franka Kitchen and MetaWorld, we found no significant difference. As a result, we used  $m = 1$  (i.e. standard Gaussian distribution) for those tasks to maximize comparability with prior benchmarks [13, 40].

The policy was optimized for 50000 iterations using the ADAM optimizer [38], with a learning rate of 0.0001 and a L2 weight decay of 0.0001. In addition, we applied data augmentation (random crops and random blur) to the input image  $i_t$ , before passing it  $E$ . This was based on recommendations for best practices from Hansen et. al. [42]. The full code for this setup is open-sourced on our website: <https://sites.google.com/view/robotics-datasets-analysis>.

## C Task Hyperparameters

This section describes the hyperparameters made while setting up both sim and real world tasks. All code (for robot/sim environments and BC training) is open sourced.

**Simulation** The simulation tasks were taken from standard benchmarks (MetaWorld [39], Franka Kitchen [40], RoboSuite [41]) in the robotics field. The training demonstrations were collected by previous work (CortexBench [13], Relay Policy Learning [40], RoboMimic [36] respectively), and were directly used in our tasks. We fine-tune on  $n = 25$  demos for MetaWorld/Franka Kitchen, and  $n = 200$  demos on RoboSuite (again to stay consistent with older papers). Task success is measured by the environments themselves, and we get numbers by estimating success rates empirically using 50 test trajectories. Note that we only evaluate the policy at the end of training (unlike some prior work that evaluated multiple times over the course of training). This was done to ensure the sim evaluation setup matched the real world (i.e. we can't evaluate real policies multiple times during training).

**Real World** As discussed in Sec. 3, our real world tasks were built using a Franka Panda robot, and we collected 50 demonstrations for each task using a VR tele-op setup. We heavily encourage the reader to get a feel for the training data and tasks by viewing the supplemental video on our website: <https://sites.google.com/view/robotics-datasets-analysis>.

The following section expands on our real world task descriptions from Sec. 3, and provides some additional details:

- **Block stacking** requires the robot to pick up the red block and place it on the green block. This is the simplest task, since the robot only has to adapt to new object configurations during test time, but it still requires the robot to precisely localize and grasp the (small) red block.  
We evaluated agents on this task using 25 test positions for the red/green block. These test positions were kept fixed for all policies to ensure maximum reproducibility.
- **Pouring** requires the robot to lift the cup and pour almonds in the target bowl. During test time the cup and target bowls are both novel objects (unseen during training), and are placed in random locations. Thus, this task forces the robot to generalize to new visual inputs.  
We evaluated 3 separate cup/target bowl pairs in 5 positions each (so 15 trials total). Note that none of these objects or positions were seen during test time. Again, the object and position combinations were kept fixed across every model tested.
- **Toasting** is the final task, and it requires the robot to pick up the object, place it in the toaster, and then shut the toaster. During test time, we use a novel object and randomize both the object's initial pose and the toaster's initial orientation. This is the most difficult task, since it requires the robot to execute a multi-stage manipulation strategy, while also generalizing to new visual scenarios.  
We evaluated 2 target objects pairs and randomized the toaster orientation into 5 separate poses (so 10 trials total). Note that none of these objects or toaster orientations were seen during test time. As before, all the test conditions were shared across all policies.
